# Supplementary material for: Theta-burst stimulation over primary somatosensory cortex modulates tactile acuity of tongue
Source: PubMed Central journal article supplement — bioRxiv. 2024 Jun 18:2024.06.17.599457. Preprint. [Version 1] doi: 10.1101/2024.06.17.599457 (PMC11213019; doi:10.1101/2024.06.17.599457), 2024-06-18
Supplement: NIHPP2024.06.17.599457v1-supplement-1.pdf [file NIHPP2024.06.17.599457v1-supplement-1.pdf]

## Supplementary materials

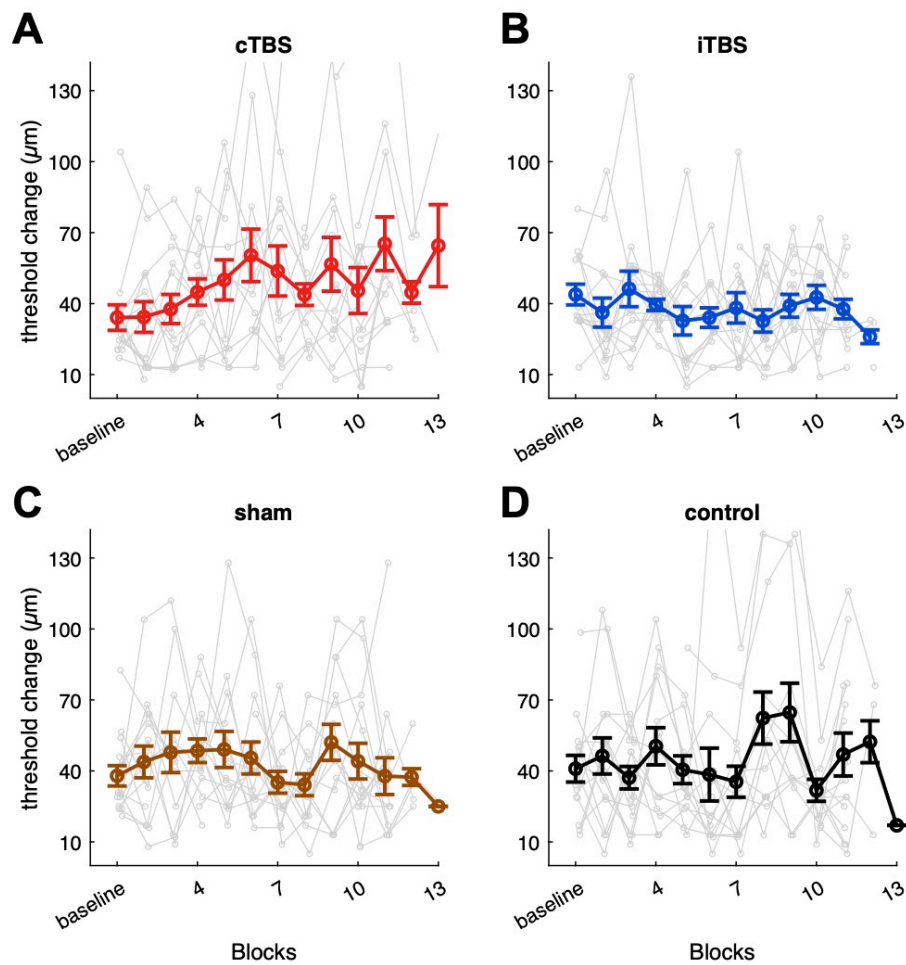

Figure S1: Spatial amplitude discrimination thresholds (SDT) for each block before (baseline) and after stimulations are shown for individuals (small dots, thin lines) and group mean data (large dots, thick lines). Error bars show standard error. A: cTBS stimulation, B: iTBS stimulation, C: sham stimulation, D: control session (no TMS stimulation).

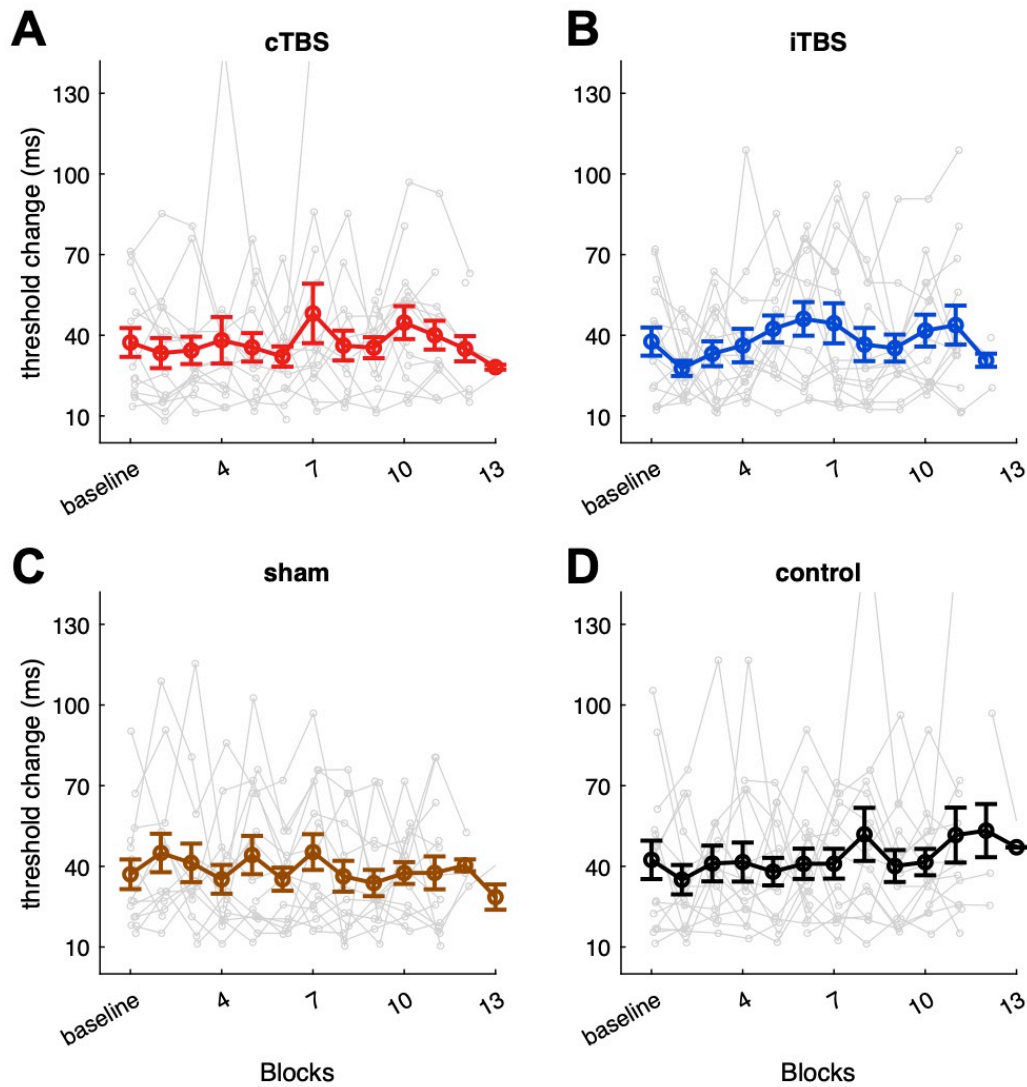

Figure S2: Temporal discrimination thresholds (TDT) for each block before (baseline) and after stimulations are shown for individuals (small dots, thin lines) and group mean data (large dots, thick lines). Error bars show standard error. A: cTBS stimulation, B: iTBS stimulation, C: sham stimulation, D: control session (no TMS stimulation).
